# Supplementary material for: Diversity and Community Composition of Labyrinthulomycetes Protists in the Coastal Zone of Hainan Island, South China Sea
Source: MDPI journal article supplement (doi:10.3390/w15040738), 2023-02-13
Supplement: s1 [file s1]

Archive with 1 entries (1 files):
- water-2060091-supplementary.pdf
