# Supplementary material for: Diversity and Community Composition of Labyrinthulomycetes Protists in the Coastal Zone of Hainan Island, South China Sea
Source: MDPI journal article supplement (doi:10.3390/w15040738), 2023-02-13
Supplement: s1 [file s1 › water-2060091-supplementary.pdf]

## Supplementary Information

### Diversity and Community Composition of Labyrinthulomycetes Protists in the Coastal Zone of Hainan Island, South China Sea

Jing Song<sup>1</sup>, Xiuping Liu<sup>1</sup>, Ningdong Xie<sup>1</sup>, Jiaqian Li<sup>1</sup>, Xianhua Liu<sup>1</sup>, Biswarup Sen<sup>1,\*</sup> and Guangyi Wang<sup>1,2,3,4,\*</sup>

<sup>1</sup>Center for Marine Environmental Ecology, School of Environmental Science and Engineering, Tianjin University, Tianjin 300072, China;

<sup>2</sup>Frontiers Science Center for Synthetic Biology, Tianjin University, Tianjin 300072, China

<sup>3</sup>Key Laboratory of Systems Bioengineering (MOE), Tianjin University, Tianjin 300072, China

<sup>4</sup>Center for Biosafety Research and Strategy, Tianjin University, Tianjin 300072, China

\*Correspondence:

bsen@tju.edu.cn (B.S.); gywang@tju.edu.cn (G.W.)

Table S1. Spearman's rank correlation coefficients and p values between the abundance of LP and environmental factors

|                 | Depth | Temp  | Sal  | Chl- <i>a</i> | NH <sub>4</sub> <sup>+</sup> | SiO <sub>3</sub> <sup>2-</sup> | PO <sub>4</sub> <sup>3-</sup> | NO <sub>3</sub> <sup>-</sup> | NO <sub>2</sub> <sup>-</sup> | TP    | TN   |
|-----------------|-------|-------|------|---------------|------------------------------|--------------------------------|-------------------------------|------------------------------|------------------------------|-------|------|
| Coefficient (ρ) | 0.05  | -0.16 | 0.22 | 0.24          | -0.20                        | -0.35                          | -0.02                         | -0.18                        | -0.32                        | -0.16 | 0.44 |
| P value         | 0.86  | 0.52  | 0.39 | 0.35          | 0.42                         | 0.13                           | 0.95                          | 0.48                         | 0.20                         | 0.53  | 0.07 |

Table S2. Taxonomy of shared ASVs and their relative abundance

| ID    | Taxonomy                                                                                                                        | Relative abundance (%) |
|-------|---------------------------------------------------------------------------------------------------------------------------------|------------------------|
| ASV1  | d__Eukaryota; p__Labyrinthulomycetes; c__Labyrinthulomycetes; o__Labyrinthulomycetes; f__Thraustochytriaceae; g__Aplanochytrium | 39.97                  |
| ASV2  | d__Eukaryota; p__Labyrinthulomycetes                                                                                            | 9.30                   |
| ASV10 | d__Eukaryota; p__Labyrinthulomycetes; c__uncultured; o__uncultured; f__uncultured; g__uncultured                                | 2.06                   |

Note: d = domain; p = phylum; c = class; o = order; f = family; g = genus.

Table S3. Properties of the interaction network between Labyrinthulomycetes and Bacteria in the surface seawater.

|          | p Laby | <i>Aplanochytrium</i> | f Laby | <i>Ulkenia</i> | <i>Aurantiochytrium</i> |
|----------|--------|-----------------------|--------|----------------|-------------------------|
| Degree   | 11     | 9                     | 4      | 4              | 3                       |
| Positive | 90.91% | 11.11%                | 25%    | 66.67%         | 0                       |
| Negative | 9.09%  | 88.89%                | 75%    | 33.33%         | 100%                    |

Table S4. Properties of the interaction network between Labyrinthulomycetes and Bacteria in the bottom seawater

|          | <i>Aplanochytrium</i> | f Laby | <i>Aurantiochytrium</i> | p Laby | o Laby | <i>Ulkenia</i> |
|----------|-----------------------|--------|-------------------------|--------|--------|----------------|
| Degree   | 18                    | 11     | 11                      | 8      | 8      | 8              |
| Positive | 16.67%                | 36.36% | 100%                    | 75%    | 37.5%  | 50%            |
| Negative | 83.33%                | 63.64% | 0                       | 25%    | 62.5%  | 50%            |

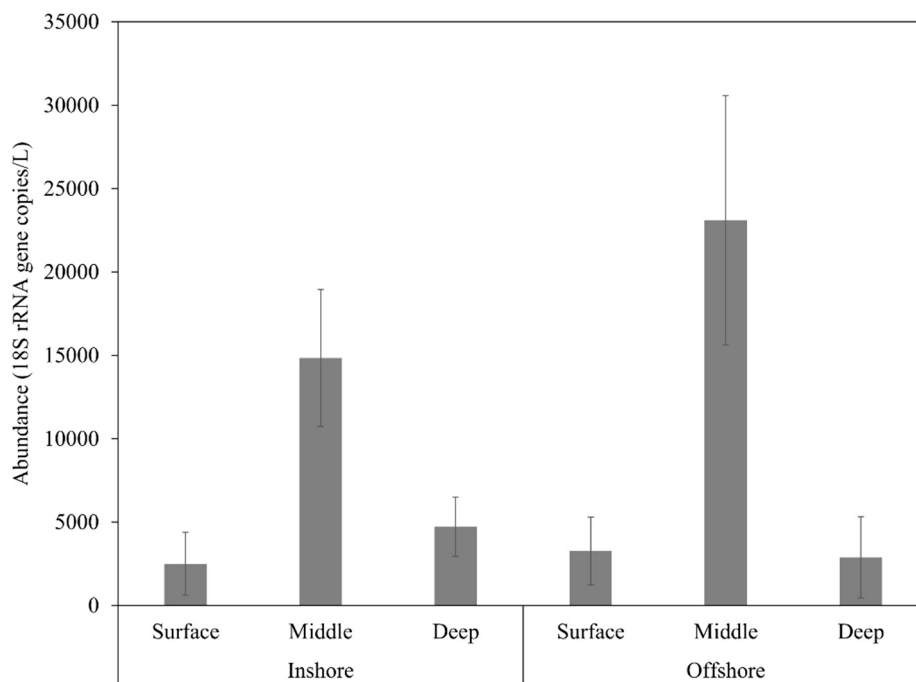

Figure S1. Abundance of Labyrinthulomycetes protists at different depths in the inshore and offshore habitats. The data represent the mean  $\pm$  S.E of three stations.

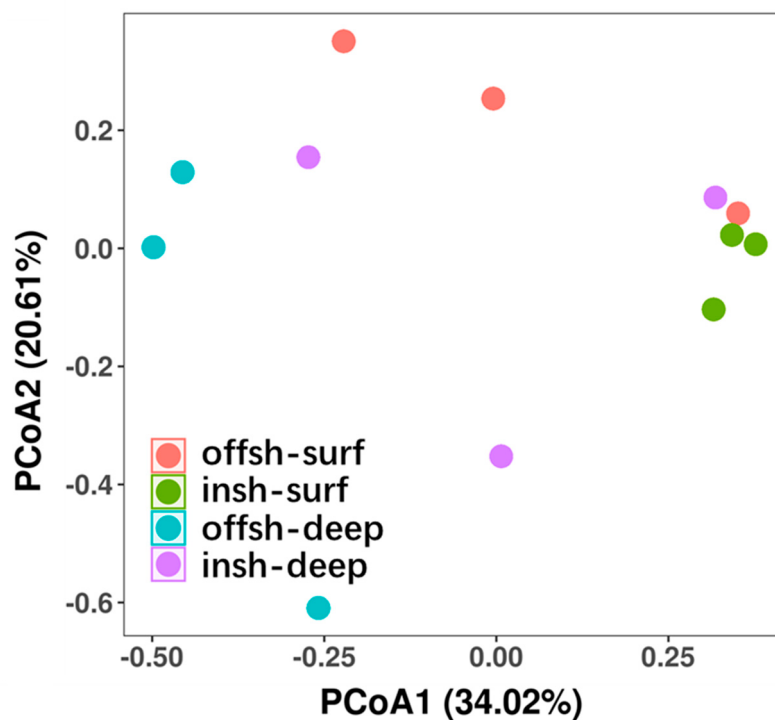

Figure S2. Principal coordinate analysis (PCoA) based on Bray-Curtis similarities among the communities of Labyrinthulomycetes. Labels “offsh-surf”, “insh-surf”, “offsh-deep” and “insh-deep” represent offshore surface water, inshore surface water, offshore deep water and inshore deep water, respectively.

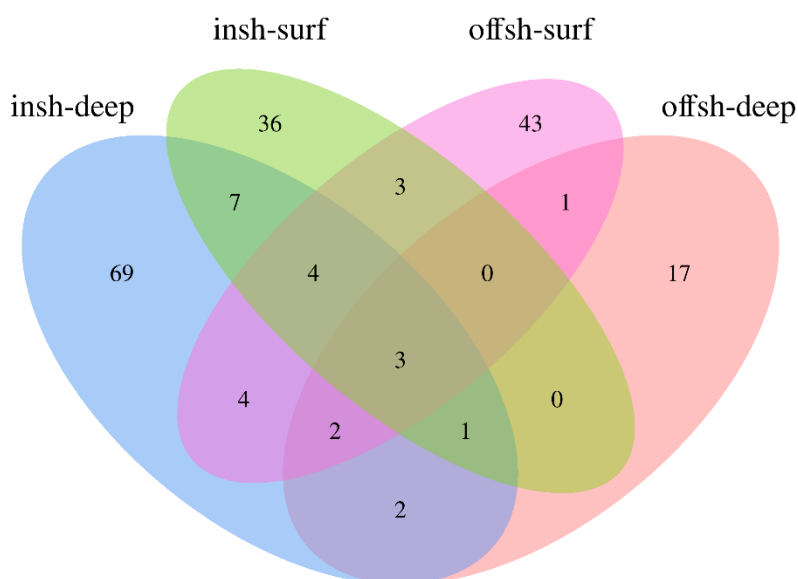

Figure S3. Venn diagram showing the unique and common ASV numbers of different habitats. Labels “insh-deep”, “insh-surf”, “offsh-surf” and “offsh-deep” represent inshore deep water, inshore surface water, offshore surface water, and offshore deep water, respectively.

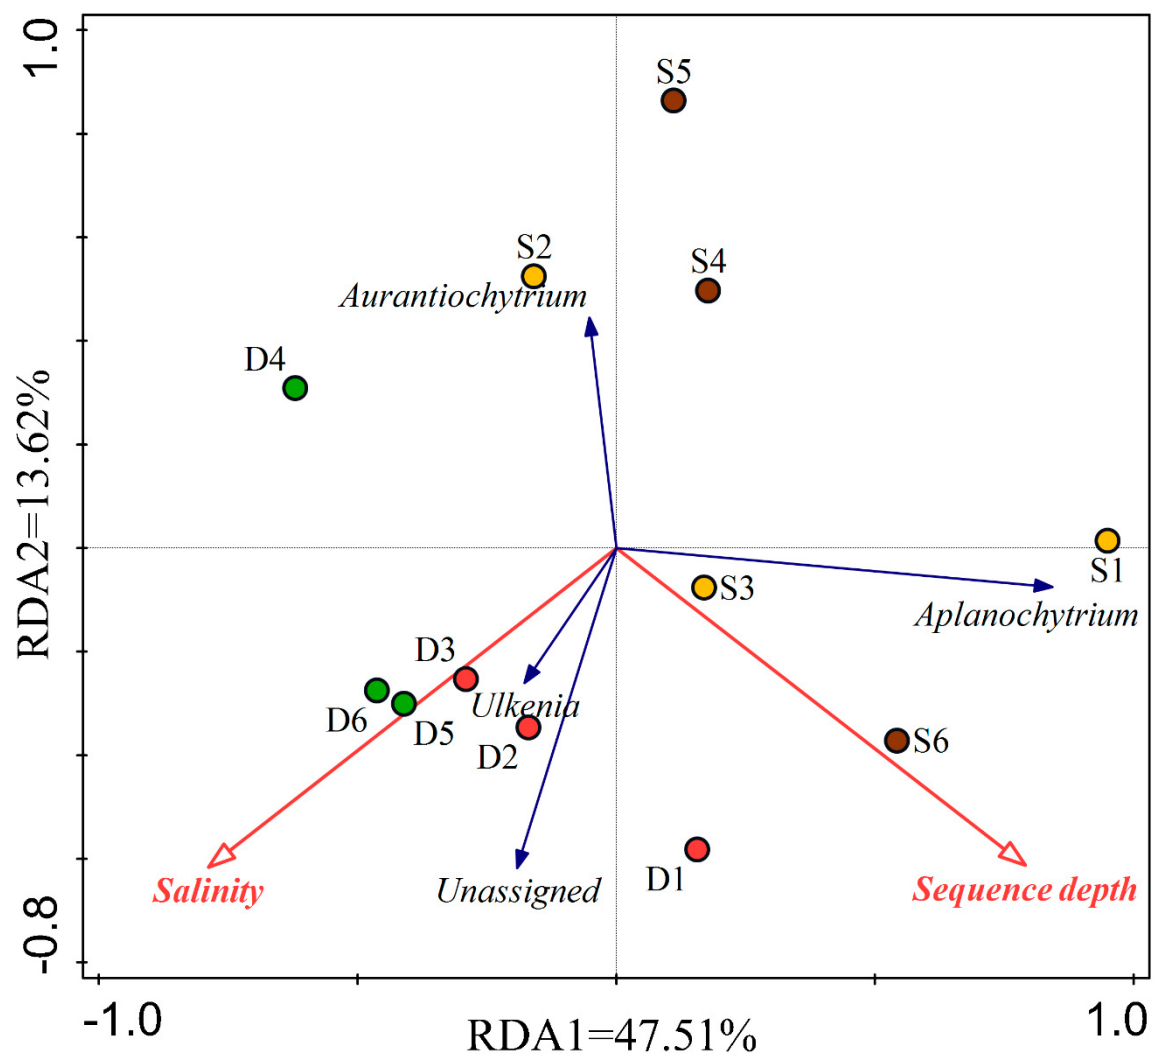

Figure S4. Redundancy analysis (RDA) based on the level of the genus *Labyrinthulomycetes*. In simple effects and condition effects, only salinity ("salt") was significantly associated. The term "abundance" refers to the sequencing depth of each station.
